# Supplementary material for: Site-specific transition of cytosine to uracil via reversible DNA photoligation
Source: Royal Society of Chemistry journal article supplement (doi:10.1039/b605289d), 2006-01-01
Supplement: b605289d.pdf [file b605289d.pdf]

## Site-Specific Transition of Cytosine to Uracil *via* Reversible DNA Photoligation

Kenzo Fujimoto,\* Shigeo Matsuda, Yoshinaga Yoshimura, Takashi Matsumura,  
Masayuki Hayashi, Isao Saito

Prof. Dr. K. Fujimoto, Dr. Y. Yoshimura, T. Matsumura

School of Materials Science, Japan Advanced Institute of Science and Technology, and PRESTO, Japan  
science and Technology Agency, Ishikawa 923-1292, Japan

Fax: (+81) 761-51-1671

E-mail: kenzo@jaist.ac.jp

Prof. Dr. I. Saito

Current address: NEWCAT Institute, School of Engineering, Nihon University, Koriyama 963-8642,  
Japan

Dr. S. Matsuda

Current address: Department of Chemistry, The Scripps Research Institute, La Jolla, CA 92037, USA

M. Hayashi

Department of Synthetic Chemistry and Biological Chemistry, Kyoto University, Kyoto 606-8501, Japan

### Contents.

1. Experimental procedure for site-specific transition *via* reversible DNA photoligation.
2. Synthesis and characterization of <sup>CV</sup>U-containing ODN.
3. Experimental procedure for time course of the deamination reaction in C<><sup>CV</sup>U adduct in ligated site.

**Supporting Information Available.** Experiment details, characterization data, and PAGE chart (4 pages). See any current masthead for ordering information and Web access instructions.

**Gneneral.**  $^1\text{H}$  NMR spectra were measured on Varian GEMINI-200 (200 MHz) or JEOL JNM A-400 (400 MHz) spectrometers. Coupling constants ( $J$  values) are reported in Hz. The chemical shifts are expressed in ppm downfield from residual chloroform ( $\delta = 7.24$  in  $^1\text{H}$  NMR) and water ( $\delta = 4.65$  in  $^1\text{H}$  NMR) as an internal standard. Mass spectra were recorded on a JEOL JMS DX-300. JASCO V-550 UV/VIS spectrophotometer was used for absorption spectra measurements. Irradiation was performed by VILBER LOURMAT transilluminator (TFP-35L, 366 nm, 180 W, 4000  $\text{J}/\text{cm}^2$ ) or FUNAKOSHI transilluminator (FTI-36M, 302 nm, 180 W). HPLC was performed on a Chemcobond 5-ODS-H column ( $10 \times 150$  mm,  $4.6 \times 150$  mm) or a Chemcosorb 5-ODS-H column ( $4.6 \times 150$  mm) with a JASCO PU-980, HG-980-31, DG-980-50 system equipped with a JASCO UV 970 detector at 254 and 230 nm. Photodiode array HPLC was performed on a Cosmosil 5C18AR column ( $4.6 \times 150$  mm) with a Tosoh CCPE-II system equipped with a Photal MCPD-3600 system.

### **Experimental procedure for site-specific transition via reversible DNA Photoligation.**

The oligonucleotides (ODNs, 400 pmol, strand concentration) were 5'-end-labeled by phosphorylation with 4  $\mu\text{L}$  of  $[\gamma\text{-}^{32}\text{P}]\text{ATP}$  and 4  $\mu\text{L}$  of T4 polynucleotide kinase using standard procedures.<sup>[S1]</sup> The 5'-end-labeled ODNs were recovered by ethanol precipitation and further purified by 15% denaturing gel electrophoresis and isolated by the crush and soak method.<sup>[S2]</sup> A solution (total volume 10  $\mu\text{L}$ ) containing  $^{32}\text{P}$ -5'-end-labeled ODN **1** (ca.  $2 \times 10^4$  cpm, 1  $\mu\text{M}$ ) and ODN **2** (7  $\mu\text{M}$ , strand conc.) in 50 mM sodium cacodylate buffer (pH 7.0) and 100 mM NaCl was irradiated with a transilluminator at 366 nm at a distance of 3-5 cm at 0  $^\circ\text{C}$  for 3 h. The reaction mixture was heated at 90  $^\circ\text{C}$  for 2 h and followed by irradiation at 302 nm for 1 h at 40  $^\circ\text{C}$ . To the reaction mixture was next added Uracil DNA glycosylase (UDG, 1 unit) and incubated at 37  $^\circ\text{C}$  for 1 h. The reaction mixture was treated with 1 M piperidine at 90  $^\circ\text{C}$  for 20 min and then evaporated under vacuum followed by coevaporation with water twice. To the reaction mixture were added 10  $\mu\text{L}$  of loading buffer (a solution of 80% v/v formamide 1 mM EDTA, 0.1% xylene cyanol, and 0.1% bromophenol blue) and 10  $\mu\text{L}$  of water and the samples (1-2  $\mu\text{L}$ , ca.  $2\text{-}4 \times 10^3$  cpm) were loaded onto 20% (19 : 1) polyacrylamide and 7 M urea denatured gel and electrophoresed at 700 V for 30 min. The gel was dried and exposed to X-ray film with intensifying sheets at  $-80$   $^\circ\text{C}$ .

[S1] J. Sambrook, E. F. Fritsch, T. Maniatis, *Molecular Cloning: A Laboratory Manual*, 2<sup>nd</sup> Ed., Cold Spring Harbor Laboratory Press: New York, **1989**.

[S2] A. M. Maxam, W. Gilbert, *Proc. Natl. Acad. Sci. USA* **1977**, *74*, 560; T. Maniatis, E. F. Fritsch, J. Sambrook, *Molecular Cloning*; Cold Spring Harbor Laboratory Press: Plainview, New York, **1982**.

### **Synthesis and characterization of <sup>CV</sup>U-containing ODN.**

<sup>CV</sup>U-containing ODN was synthesized by automated solid-phase phosphoramidite method as reported.<sup>[S3]</sup> After automated synthesis, the oligomers were cleaved from the support and deprotected by 0.4 M methanolic sodium hydroxide (methanol : water = 4 : 1) for 17 h at room temperature and purified by reverse phase HPLC. The purity and concentration of all oligodeoxynucleotides were determined by complete digestion with s.v. PDE, AP, and Nuclease P1 to 2'-deoxymononucleosides at 37 °C for 1 h. Incorporation of <sup>CV</sup>U into oligonucleotides was confirmed by enzymatic digestion and MALDI-TOF-MS analysis. MALDI-TOF-MS: calcd. for ODN **2** (C<sub>206</sub>H<sub>259</sub>N<sub>75</sub>O<sub>128</sub>P<sub>20</sub>) [(M-H)<sup>-</sup>] 6452.25; found 6452.60.

[S3] K. Fujimoto, N. Ogawa, M. Hayashi, S. Matsuda, I. Saito, *Tetrahedron Lett.* **2000**, *41*, 9437.

### **Experimental procedure for time course of the deamination reaction.**

A solution (total volume 10 μL) containing <sup>32</sup>P-5'-end-labeled ODN **1** (ca. 2 × 10<sup>4</sup> cpm, 1 μM) and ODN **2** (7 μM, strand conc.) in 50 mM sodium cacodylate buffer (pH 7.0) and 100 mM NaCl was irradiated with a transilluminator at 366 nm at a distance of 3-5 cm at 0 °C for 3 h or 4 h. The reaction mixture was heated at 90 °C for each time. The reaction samples were irradiated at 302 nm and treated with UDG and piperidine as described above. The reaction samples were loaded onto 20% (19 : 1) polyacrylamide and 7 M urea denatured gel and electrophoresed at 700 V for 30 min. The gel was dried and exposed to X-ray film with intensifying sheets at -80 °C. The gels were analyzed by autoradiography with a densitometer and BIORAD Molecular Analyst software (version 2.1). The intensities of the cleaved bands were determined by volume integration (Figure S1). The rate constant (k) for deamination of C-<sup>CV</sup>U photoadduct in the ligation site can be calculated from the equation (1)

$$k = -\ln(1-x)/t \quad (1)$$

where  $x$  is the fraction of cytosine converted into uracil which is determined from the intensities of the cleaved bands and  $t$  is time of incubation.

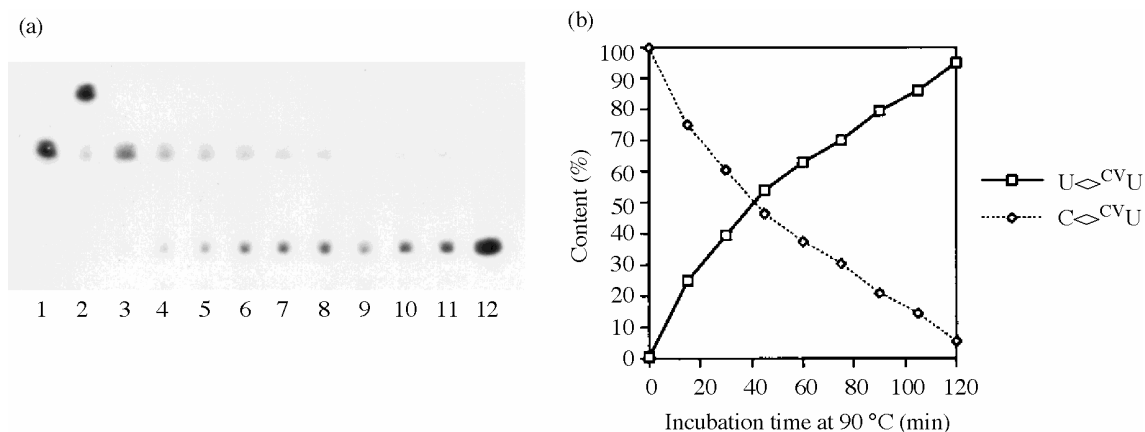

**Figure S1.** (a) PAGE analysis for time course of deamination. Lane 1, before photoligation; lane 2, ODN **1**+ ODN **2**, irradiation at 366 nm, 1 h on ice; lane 3, lane 2 + 90 °C, 0 min + 302 nm, 1 h, r.t. + UDG (37 °C, 1 h) + piperidine (90 °C, 30 min); lane 4, 5, 6, 7, 8, 9, 10, 11, under the same condition of lane 3 except for 90 °C, 15 min, 30 min, 45 min, 60 min, 75 min, 90 min, 105 min, 120 min respectively; lane 12, treatment of ODN **4** with UDG and piperidine treatment under the same condition of lane 3. (b) Time course for the conversion of C-<sup>cv</sup>U adduct and the formation of U-<sup>cv</sup>U adduct in ligated site based on the intensities of the cleaved bands were determined by volume integration.
